# Supplementary material for: Relative importance of perceived physical and social neighborhood characteristics for depression: a machine learning approach
Source: Springer Nature journal article supplement (doi:10.1007/s00127-019-01808-5), 2019-11-14
Supplement: MOESM1 [file 17387708]

**Supplementary materials**

**Relative importance of perceived physical and social neighborhood characteristics for depression: A machine learning approach**

**Model descriptions**

The generalized linear model (GLM) [34] extends the ordinary linear regression for non-normal error distributions and non-constant variances. Model parameters were estimated through the maximum likelihood approach. We assumed a normal distribution of the error and used an identity link function.

An artificial neural networks (NNET) [35] consists of interconnected neurons, typically arranged in layers. Each connection has a weight and each neuron has an activation function (e.g., sigmoid function) assigned. Input data is passed from the first to the subsequent layers. At each layer, the signals are summed and transformed in accordance to the weight of the connections between the neurons and the activation functions of the neurons. The output of the final layer represents the network output. The connections weights are typically learned by back-propagation.

A random forest (RF) [36] consists of an ensemble of weak decision trees. Each tree is based on a random bootstrap sample (i.e., sampling with replacement) of the data. During the building of the decision trees, at each split only a fixed number of randomly selected variables are considered. This approach reduces correlations between the predictions of the individual trees. The final prediction represents the mean predictions of the individual decision trees.

The gradient boosting machine (GBM) [37] iteratively fits an ensemble of weak models (i.e., small decision trees) to the data. During each iteration, the previous fit is improved by fitting an additional weak model to the negative gradient of the loss function. Then, the estimate of the prediction function is updated with the estimate of the negative gradient.

Table A1. ML models and used parameter settings.

| Model | R package | Chosen parameters |
| --- | --- | --- |
| GLM | stats |  |
| NNET | nnet | linOut=T, maxit=1,000, size=8, decay=36 |
| RF | randomForest | nodesize=80, mtry=3 |
| GBM | gbm | interaction.depth=4, n.trees=500, shrinkage=0.01, n.minobsinnode=44 |

Model parameters were determined through CV.

Table A2. Results of the Wilcoxon tests between the models.

| Fit measure | Models |  | *p*-value | adjusted *p*-value* |
| --- | --- | --- | --- | --- |
| *RMSE* | GBM | GLM | 0.014 | 0.084 |
|  | GBM | NNET | 0.158 | 0.315 |
|  | GBM | RF | 0.333 | 0.399 |
|  | GLM | NNET | 0.274 | 0.399 |
|  | GLM | RF | 0.119 | 0.315 |
|  | NNET | RF | 0.624 | 0.624 |
| *R2* | GBM | GLM | 0.000 | 0.000 |
|  | GBM | NNET | 0.002 | 0.004 |
|  | GBM | RF | 0.087 | 0.104 |
|  | GLM | NNET | 0.008 | 0.012 |
|  | GLM | RF | 0.000 | 0.000 |
|  | NNET | RF | 0.184 | 0.184 |
| *MAE* | GBM | GLM | 0.001 | 0.003 |
|  | GBM | NNET | 0.096 | 0.144 |
|  | GBM | RF | 0.033 | 0.098 |
|  | GLM | NNET | 0.056 | 0.112 |
|  | GLM | RF | 0.188 | 0.226 |
|  | NNET | RF | 0.585 | 0.585 |

*** based on Benjamini and Hochberg (1995)


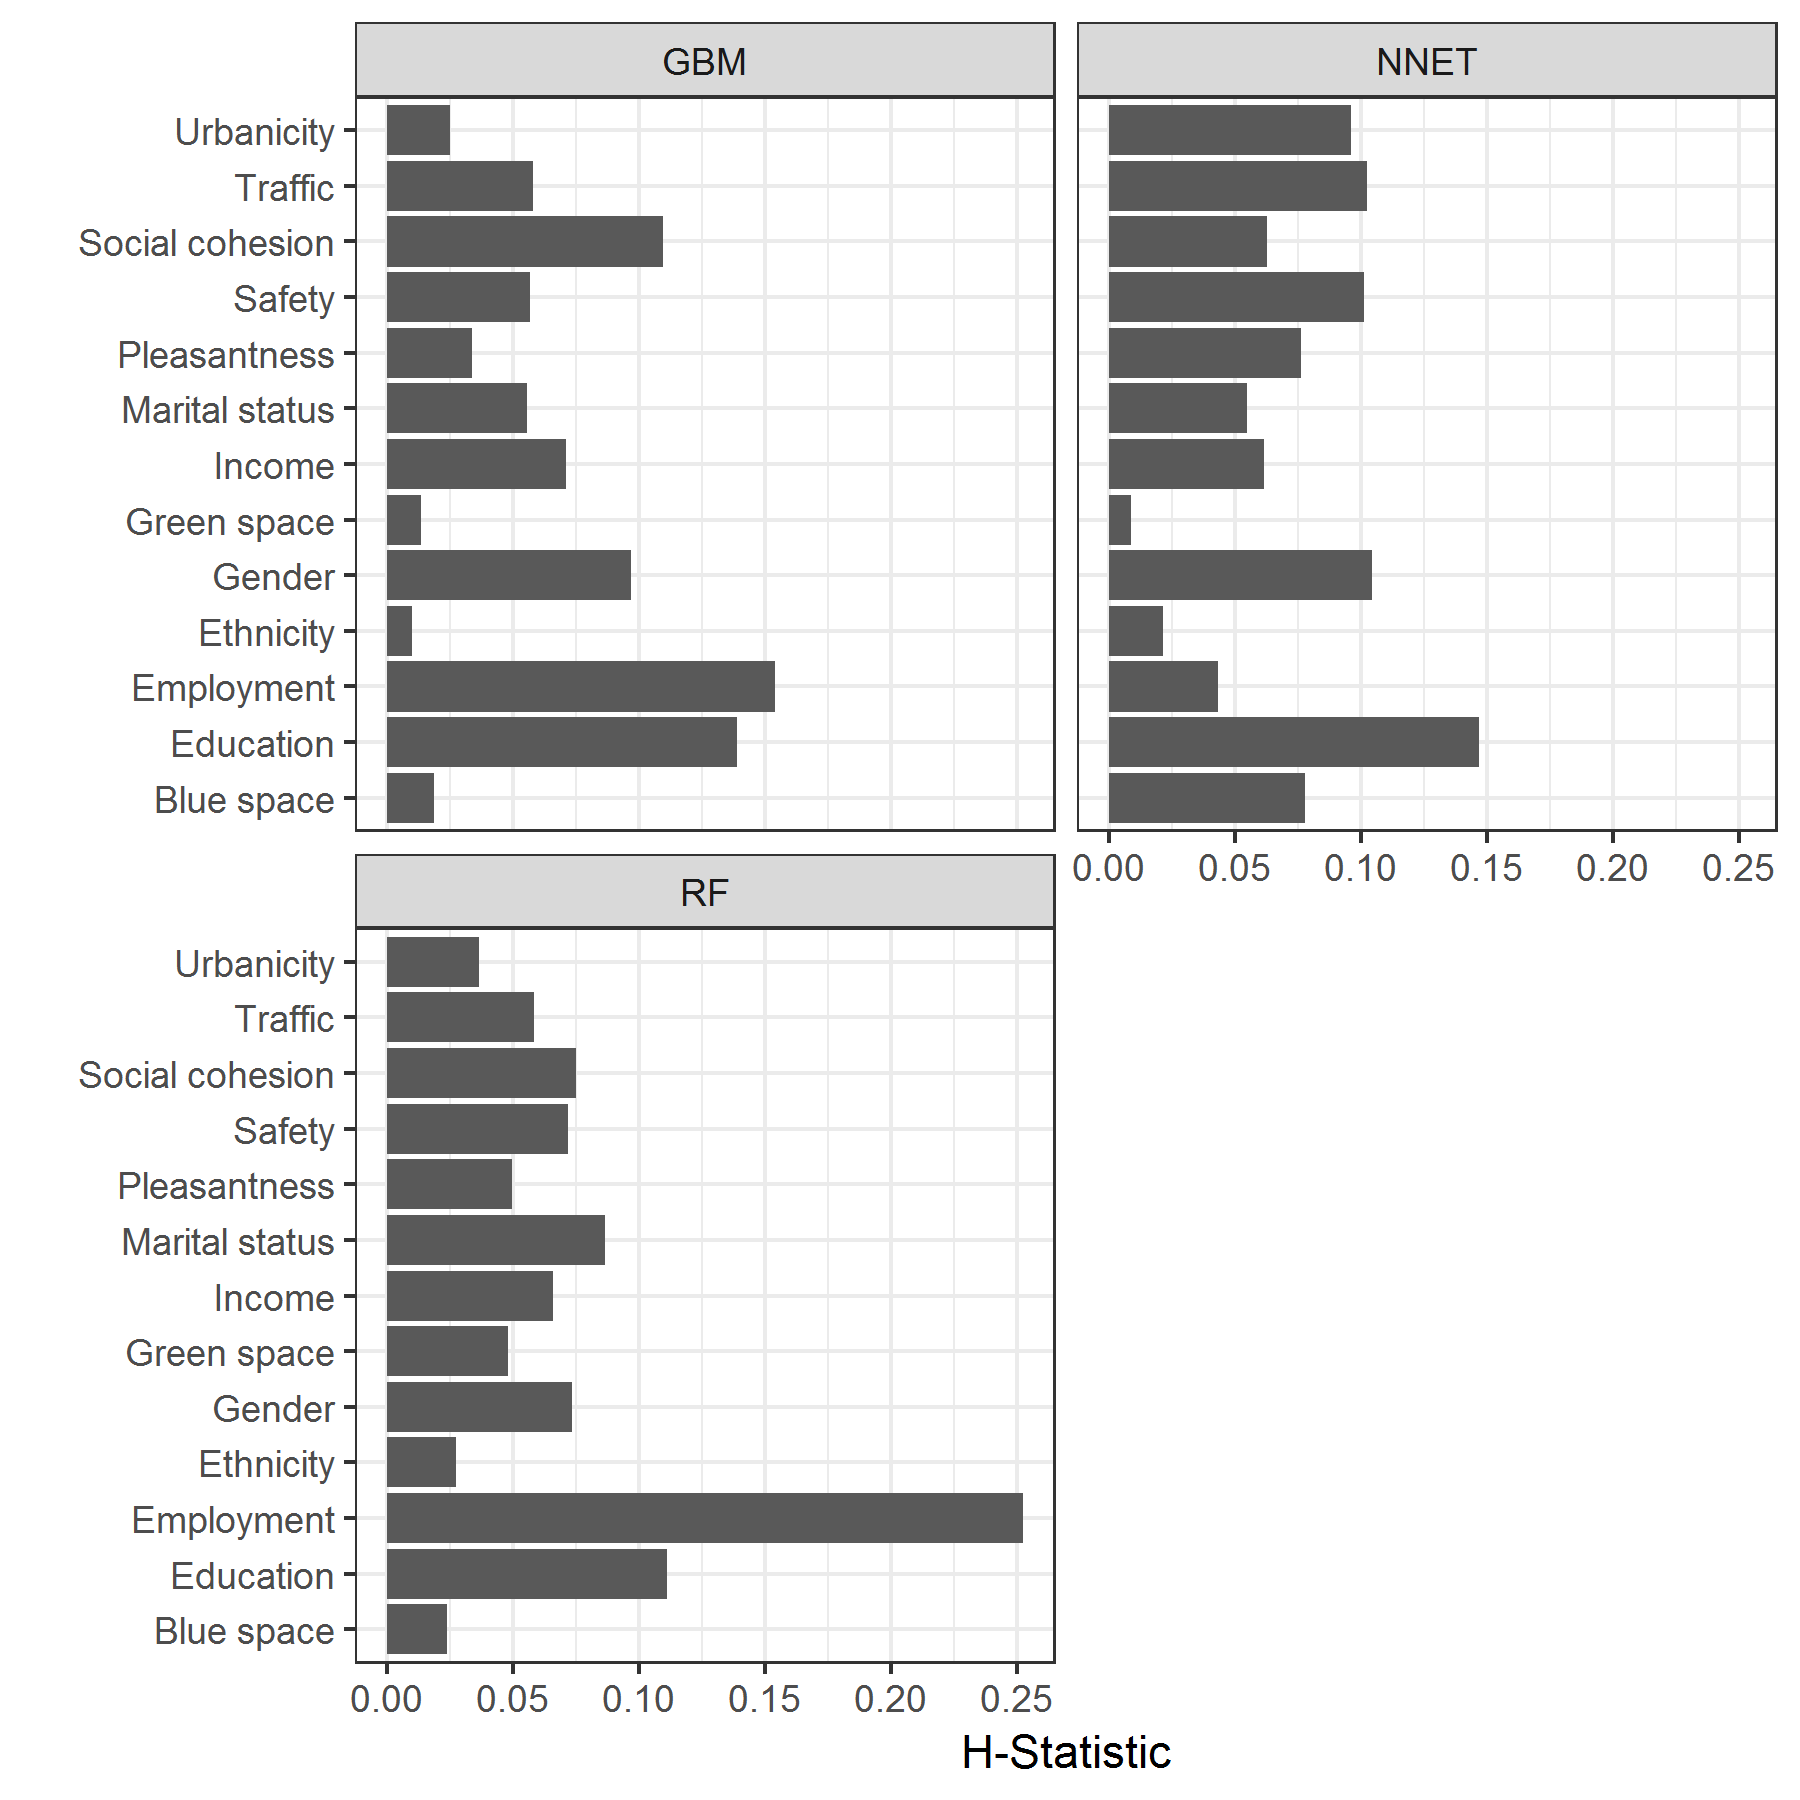


Figure A1. Bivariate variable interactions based on the H statistic for the variable age (note that the H statistic is not available for GLMs).


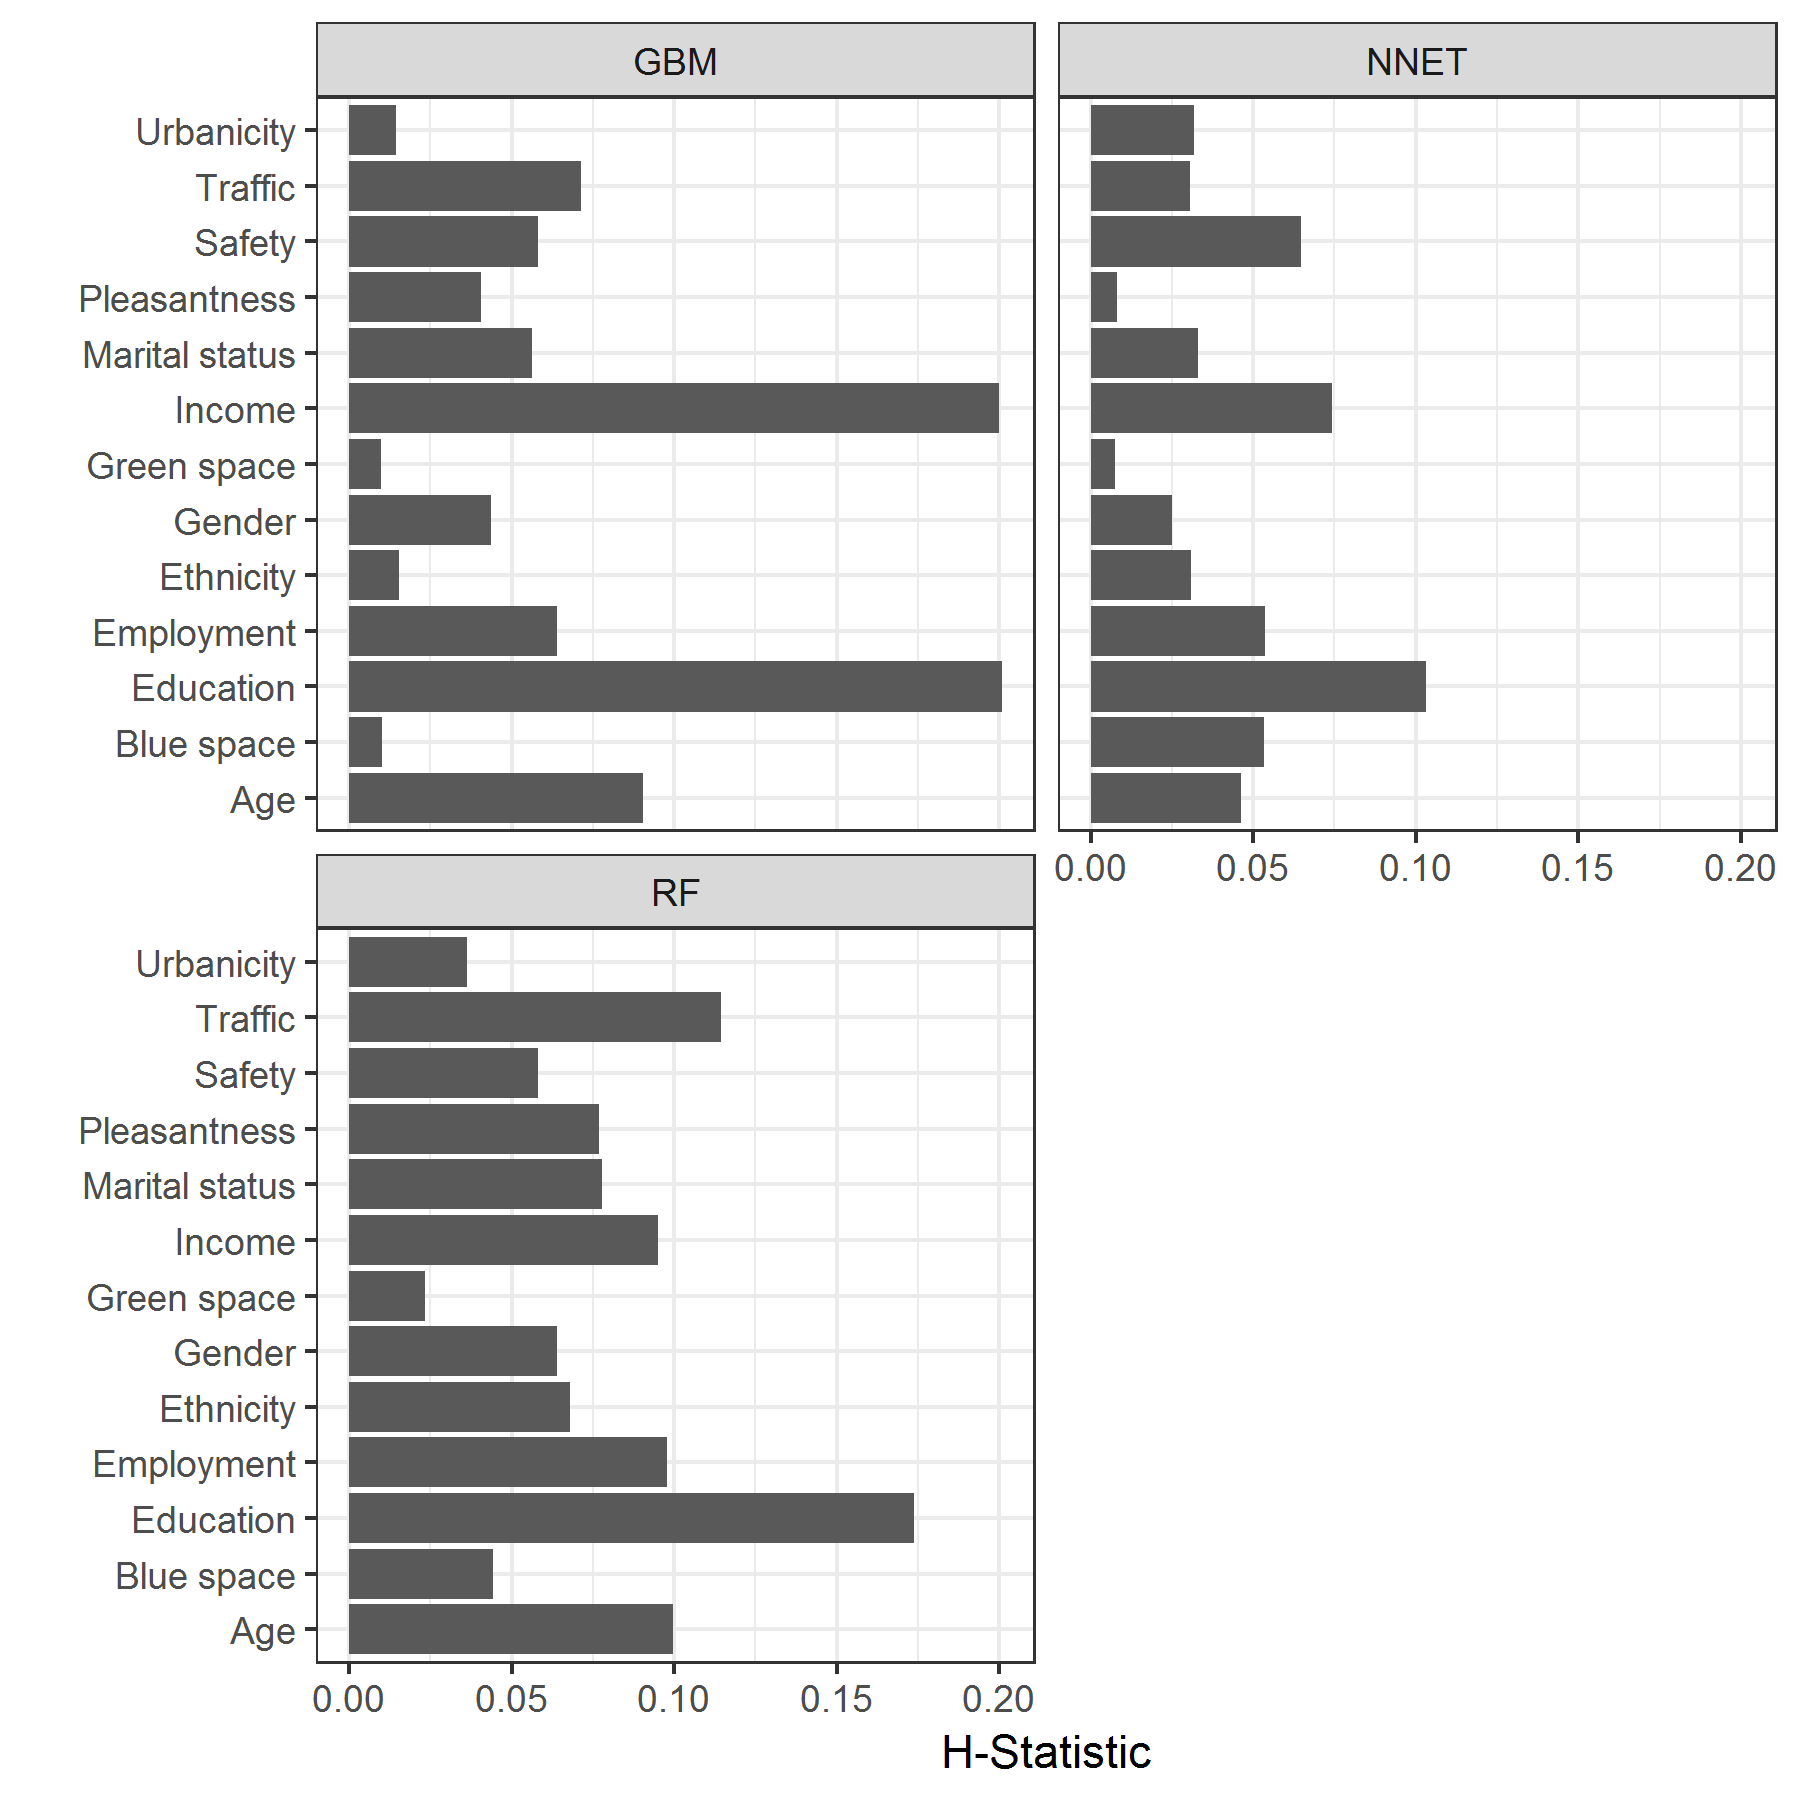


Figure A2. Bivariate interactions based on the H statistic for the variable social cohesion (note that the H statistic is not available for GLMs).
